# Supplementary material for: Diversity and Toxicity of the Genus Coolia Meunier in Brazil, and Detection of 44-methyl Gambierone in Coolia tropicalis
Source: PubMed Central journal article supplement (PMC7290302; doi:10.3390/toxins12050327), 2020-05-15
Supplement: toxins-12-00327-s001.pdf [file toxins-12-00327-s001.pdf]

# Supplementary Material for: Diversity and Toxicity of the Genus *Coolia* Meunier in Brazil, and Detection of 44-methyl Gambierone in *Coolia tropicalis*

Carlos Eduardo Junqueira de Azevedo Tibiriçá, Manoella Sibat, Luciano Felício Fernandes, Gwenaël Bilien, Nicolas Chomérat, Philipp Hess and Luiz L. Mafra, Jr

**Table S1.** List of compounds extracted from the Personal Compound Database and Library (PCDL, Agilent Mass Hunter software), created by Phycotoxins Laboratory (IFREMER, France) and used for *Coolia* spp. screening.

| Name                        | Molecular Formula                                                                | Mass (Da)   | CAS         |
|-----------------------------|----------------------------------------------------------------------------------|-------------|-------------|
| Cooliatoxin metabolite 1    | C <sub>56</sub> H <sub>78</sub> O <sub>18</sub> S <sub>2</sub>                   | 1102.46296  |             |
| Cooliatoxin metabolite 2    | C <sub>57</sub> H <sub>80</sub> O <sub>18</sub> S <sub>2</sub>                   | 1116.47861  |             |
| Cooliatoxin metabolite 3    | C <sub>57</sub> H <sub>78</sub> O <sub>19</sub> S <sub>2</sub>                   | 1130.45787  |             |
| Cooliatoxin metabolite 4    | C <sub>57</sub> H <sub>84</sub> O <sub>18</sub> S <sub>2</sub>                   | 1120.50991  |             |
| Cooliatoxin metabolite 5    | C <sub>58</sub> H <sub>86</sub> O <sub>18</sub> S <sub>2</sub>                   | 1134.52556  |             |
| Cooliatin                   | C <sub>15</sub> H <sub>22</sub> NaO <sub>4</sub>                                 | 289.14158   |             |
| desulfo-YTX (cooliatoxin)   | C <sub>55</sub> H <sub>82</sub> O <sub>18</sub> S                                | 1062.52219  | 255041-59-9 |
| YTX                         | C <sub>55</sub> H <sub>82</sub> O <sub>21</sub> S <sub>2</sub>                   | 1142.479    | 112514-54-2 |
| Homo-YTX                    | C <sub>56</sub> H <sub>84</sub> O <sub>21</sub> S <sub>2</sub>                   | 1156.49465  | 196309-94-1 |
| 45-OH-YTX                   | C <sub>55</sub> H <sub>82</sub> O <sub>22</sub> S <sub>2</sub>                   | 1158.47392  | 124863-39-4 |
| 45-OH-Homo-YTX              | C <sub>56</sub> H <sub>84</sub> O <sub>22</sub> S <sub>2</sub>                   | 1172.48957  | 196309-97-4 |
| COOH-YTX                    | C <sub>55</sub> H <sub>82</sub> O <sub>23</sub> S <sub>2</sub>                   | 1174.46883  | 262842-91-1 |
| COOH Homo YTX               | C <sub>56</sub> H <sub>84</sub> O <sub>23</sub> S <sub>2</sub>                   | 1188.48448  | 292850-13-6 |
| Heptanor-41-oxo-Homo-YTX    | C <sub>49</sub> H <sub>74</sub> O <sub>21</sub> S <sub>2</sub>                   | 1062.4164   | 346631-41-2 |
| 40-epi-Heptanor-41-oxo-YTX  | C <sub>48</sub> H <sub>72</sub> O <sub>21</sub> S <sub>2</sub>                   | 1048.40075  | 803745-66-6 |
| YTX enone                   | C <sub>48</sub> H <sub>72</sub> O <sub>21</sub> S <sub>2</sub>                   | 1048.40075  | 803745-67-7 |
| Heptanor-41-oxo-YTX         | C <sub>48</sub> H <sub>72</sub> O <sub>21</sub> S <sub>2</sub>                   | 1048.40075  | 448238-76-4 |
| 40-epi-Heptanor-nor-YTX     | C <sub>45</sub> H <sub>67</sub> O <sub>20</sub> S <sub>2</sub>                   | 991.366711  |             |
| Heptanor-nor-YTX enone      | C <sub>45</sub> H <sub>67</sub> O <sub>20</sub> S <sub>2</sub>                   | 991.366711  |             |
| Heptanor-41-nor-oxo-YTX     | C <sub>45</sub> H <sub>67</sub> O <sub>20</sub> S <sub>2</sub>                   | 991.366711  |             |
| 32-O-triarabinosyl-HomoYTX  | C <sub>71</sub> H <sub>107</sub> O <sub>33</sub> S <sub>2</sub>                  | 1551.613602 |             |
| 32-O-diarabinosyl-HomoYTX   | C <sub>66</sub> H <sub>99</sub> O <sub>29</sub> S <sub>2</sub>                   | 1419.571344 |             |
| 32-O-triarabinosyl-YTX      | C <sub>70</sub> H <sub>105</sub> O <sub>33</sub> S <sub>2</sub>                  | 1537.597952 |             |
| 9-Me-41-Homo-YTX amide      | C <sub>61</sub> H <sub>94</sub> NO <sub>25</sub> S <sub>2</sub>                  | 1304.555634 |             |
| 32-O-arabinosyl-YTX         | C <sub>60</sub> H <sub>89</sub> O <sub>25</sub> S <sub>2</sub>                   | 1273.513435 |             |
| 44,45-diOH-41-Homo-YTX      | C <sub>56</sub> H <sub>85</sub> O <sub>23</sub> S <sub>2</sub>                   | 1189.492305 |             |
| 44,45-diOH-Homo-YTX         | C <sub>56</sub> H <sub>85</sub> O <sub>23</sub> S <sub>2</sub>                   | 1189.492305 |             |
| 44,55-diOH-YTX              | C <sub>55</sub> H <sub>84</sub> O <sub>23</sub> S <sub>2</sub>                   | 1176.48448  | 862783-86-6 |
| 9-Me-41-Homo-YTX            | C <sub>57</sub> H <sub>85</sub> O <sub>21</sub> S <sub>2</sub>                   | 1169.502476 |             |
| 41-Homo-YTX                 | C <sub>56</sub> H <sub>84</sub> O <sub>21</sub> S <sub>2</sub>                   | 1156.49465  |             |
| Trinor-YTX                  | C <sub>52</sub> H <sub>78</sub> O <sub>21</sub> S <sub>2</sub>                   | 1102.4477   | 181365-95-7 |
| nor-YTX                     | C <sub>52</sub> H <sub>77</sub> O <sub>20</sub> S <sub>2</sub>                   | 1085.444961 |             |
| 32-O-diarabinosyl-YTX       | C <sub>65</sub> H <sub>97</sub> O <sub>29</sub> S <sub>2</sub>                   | 1405.555694 |             |
| 41-Homo-YTX amide           | C <sub>60</sub> H <sub>92</sub> NO <sub>25</sub> S <sub>2</sub>                  | 1290.539984 |             |
| 32-O-arabinosyl-HomoYTX     | C <sub>61</sub> H <sub>91</sub> O <sub>25</sub> S <sub>2</sub>                   | 1287.529085 |             |
| 9-Me-44,45-diOH-41-Homo-YTX | C <sub>57</sub> H <sub>87</sub> O <sub>23</sub> S <sub>2</sub>                   | 1203.507956 |             |
| MTX                         | C <sub>164</sub> H <sub>258</sub> O <sub>68</sub> S <sub>2</sub>                 | 3379.61719  | 59392-53-9  |
| Maitotoxin sodium           | C <sub>164</sub> H <sub>256</sub> Na <sub>2</sub> O <sub>68</sub> S <sub>2</sub> | 3423.58108  | 59392-53-9  |
| MTX4                        | C <sub>157</sub> H <sub>241</sub> NO <sub>68</sub> S <sub>2</sub>                | 3292.48724  |             |
| Gambierone                  | C <sub>51</sub> H <sub>76</sub> O <sub>19</sub> S                                | 1024.47015  |             |
| 44-methylgambierone (MTX3)  | C <sub>52</sub> H <sub>78</sub> O <sub>19</sub> S                                | 1038.4858   |             |
| Gambieroxide                | C <sub>60</sub> H <sub>90</sub> O <sub>22</sub> S                                | 1194.56445  |             |
| Gambieric acid A            | C <sub>59</sub> H <sub>92</sub> O <sub>16</sub>                                  | 1056.63854  | 138434-64-7 |

|                                          |                                                  |            |             |
|------------------------------------------|--------------------------------------------------|------------|-------------|
| Gambieric acid B                         | C <sub>60</sub> H <sub>94</sub> O <sub>16</sub>  | 1070.65419 | 141363-65-7 |
| Gambieric acid C                         | C <sub>65</sub> H <sub>100</sub> O <sub>19</sub> | 1184.68588 | 138458-89-6 |
| Gambieric acid D                         | C <sub>66</sub> H <sub>102</sub> O <sub>19</sub> | 1198.70153 | 141363-66-8 |
| Gambierol                                | C <sub>43</sub> H <sub>64</sub> O <sub>11</sub>  | 756.44486  |             |
| P-CTX 1                                  | C <sub>60</sub> H <sub>86</sub> O <sub>19</sub>  | 1110.57634 | 11050-21-8  |
| P-CTX 2 (52-epi-54-deoxy-P-CTX1)         | C <sub>60</sub> H <sub>86</sub> O <sub>18</sub>  | 1094.58142 | 142185-85-1 |
| P-CTX 3 (54-deoxy P-CTX1)                | C <sub>60</sub> H <sub>86</sub> O <sub>18</sub>  | 1094.58142 | 139641-09-6 |
| P-CTX 3C                                 | C <sub>57</sub> H <sub>82</sub> O <sub>16</sub>  | 1022.56029 | 148471-85-6 |
| P-CTX 3B                                 | C <sub>57</sub> H <sub>82</sub> O <sub>16</sub>  | 1022.56029 | 263336-58-9 |
| P-CTX 4B                                 | C <sub>60</sub> H <sub>84</sub> O <sub>16</sub>  | 1060.57594 | 123676-76-6 |
| P-CTX 4A                                 | C <sub>60</sub> H <sub>84</sub> O <sub>16</sub>  | 1060.57594 | 66231-73-0  |
| 50-OH P-CTX 3                            | C <sub>60</sub> H <sub>86</sub> O <sub>19</sub>  | 1110.57634 | 263336-54-5 |
| 52-epi P-CTX 1                           | C <sub>60</sub> H <sub>86</sub> O <sub>19</sub>  | 1110.57634 | 189013-49-8 |
| 54-Epi P-CTX 1                           | C <sub>60</sub> H <sub>86</sub> O <sub>19</sub>  | 1110.57634 | 287732-40-5 |
| 52,54- Diepi P-CTX 1                     | C <sub>60</sub> H <sub>86</sub> O <sub>19</sub>  | 1110.57634 | 287732-42-7 |
| M-seco P-CTX 4A                          | C <sub>60</sub> H <sub>86</sub> O <sub>17</sub>  | 1078.5865  | 287412-00-4 |
| M-seco 2,3dihydro, 2-OH-49-O-Me-P-CTX 3C | C <sub>58</sub> H <sub>88</sub> O <sub>18</sub>  | 1072.59707 | 374624-43-8 |
| 2,3-dihydro, 2,3,51-triOH P-CTX 3C       | C <sub>57</sub> H <sub>84</sub> O <sub>19</sub>  | 1072.56069 | 263336-63-6 |
| A-seco-2,3 dihydro,51-OH P-CTX 3C        | C <sub>57</sub> H <sub>86</sub> O <sub>18</sub>  | 1058.58142 | 263336-64-7 |
| 2,3 diOH P-CTX 3C                        | C <sub>57</sub> H <sub>84</sub> O <sub>18</sub>  | 1056.56577 | 263336-62-5 |
| M-seco 49-O-Me-P-CTX 3C                  | C <sub>58</sub> H <sub>86</sub> O <sub>17</sub>  | 1054.58651 | 287411-99-8 |
| 2,3- dihydro, 2-oxo,51-OH P-CTX 3C       | C <sub>57</sub> H <sub>82</sub> O <sub>18</sub>  | 1054.55012 | 287732-77-8 |
| 2,3- dihydro, 3-oxo, 51-OH P-CTX 3C      | C <sub>57</sub> H <sub>82</sub> O <sub>18</sub>  | 1054.55012 | 263336-61-4 |
| 2,3- dihydro-2-OH P-CTX 3C               | C <sub>57</sub> H <sub>84</sub> O <sub>17</sub>  | 1040.57086 | 287732-78-9 |
| M-seco P-CTX 3C                          | C <sub>57</sub> H <sub>84</sub> O <sub>17</sub>  | 1040.57086 | 287411-98-7 |
| 2,3- dihydro-3-OH P-CTX-3C               | C <sub>57</sub> H <sub>84</sub> O <sub>17</sub>  | 1040.57085 | 263336-60-3 |
| 51-OH P-CTX 3C                           | C <sub>57</sub> H <sub>82</sub> O <sub>17</sub>  | 1038.55521 | 263336-59-0 |
| 3-OH,7-oxo P-CTX                         | C <sub>60</sub> H <sub>88</sub> O <sub>21</sub>  | 1144.58181 | 263336-57-8 |
| 4- OH, 7-oxo P-CTX                       | C <sub>60</sub> H <sub>88</sub> O <sub>21</sub>  | 1144.58181 | 287732-85-8 |
| 7-Oxo P-CTX                              | C <sub>60</sub> H <sub>86</sub> O <sub>20</sub>  | 1126.57125 | 263336-55-6 |
| C-CTX 1                                  | C <sub>62</sub> H <sub>92</sub> O <sub>19</sub>  | 1140.62329 | 193363-37-0 |
| C-CTX 2                                  | C <sub>62</sub> H <sub>92</sub> O <sub>19</sub>  | 1140.62329 | 193363-38-1 |
| I-CTX 1                                  | C <sub>62</sub> H <sub>92</sub> O <sub>19</sub>  | 1140.62329 |             |
| I-CTX 2                                  | C <sub>62</sub> H <sub>92</sub> O <sub>19</sub>  | 1140.62329 |             |
| I-CTX 3                                  | C <sub>62</sub> H <sub>92</sub> O <sub>20</sub>  | 1156.6182  |             |
| I-CTX 4                                  | C <sub>62</sub> H <sub>92</sub> O <sub>20</sub>  | 1156.6182  |             |
| I-CTX 5                                  | C <sub>62</sub> H <sub>90</sub> O <sub>19</sub>  | 1138.60763 |             |
| I-CTX 6                                  | C <sub>62</sub> H <sub>90</sub> O <sub>20</sub>  | 1154.60255 |             |

**Table S2.** List of MRM transitions (*m/z*) used in ESI- to detect YTXs on system B (API 4000QTrap).

| Compound       | MRM transitions ( <i>m/z</i> ) | CE (eV) | CXP (eV) |
|----------------|--------------------------------|---------|----------|
| YTX            | 1141.4 > 1061.6                | -48     | -17      |
|                | 1141.4 > 855.6                 | -98     | -19      |
| Homo YTX       | 1155.6 > 1075.6                | -48     | -17      |
|                | 1155.6 > 869.4                 | -98     | -19      |
| 45-OH YTX      | 1157.5 > 1077.5                | -48     | -17      |
|                | 1157.5 > 855.5                 | -98     | -19      |
| 45-OH homo YTX | 1171.5 > 1091.5                | -48     | -17      |
|                | 1171.5 > 869.4                 | -98     | -19      |
| COOH YTX       | 1173.5 > 1093.5                | -48     | -17      |
|                | 1173.5 > 855.5                 | -98     | -19      |
| Homo COOH YTX  | 1187.5 > 1107.5                | -48     | -17      |
|                | 1187.5 > 869.4                 | -98     | -19      |

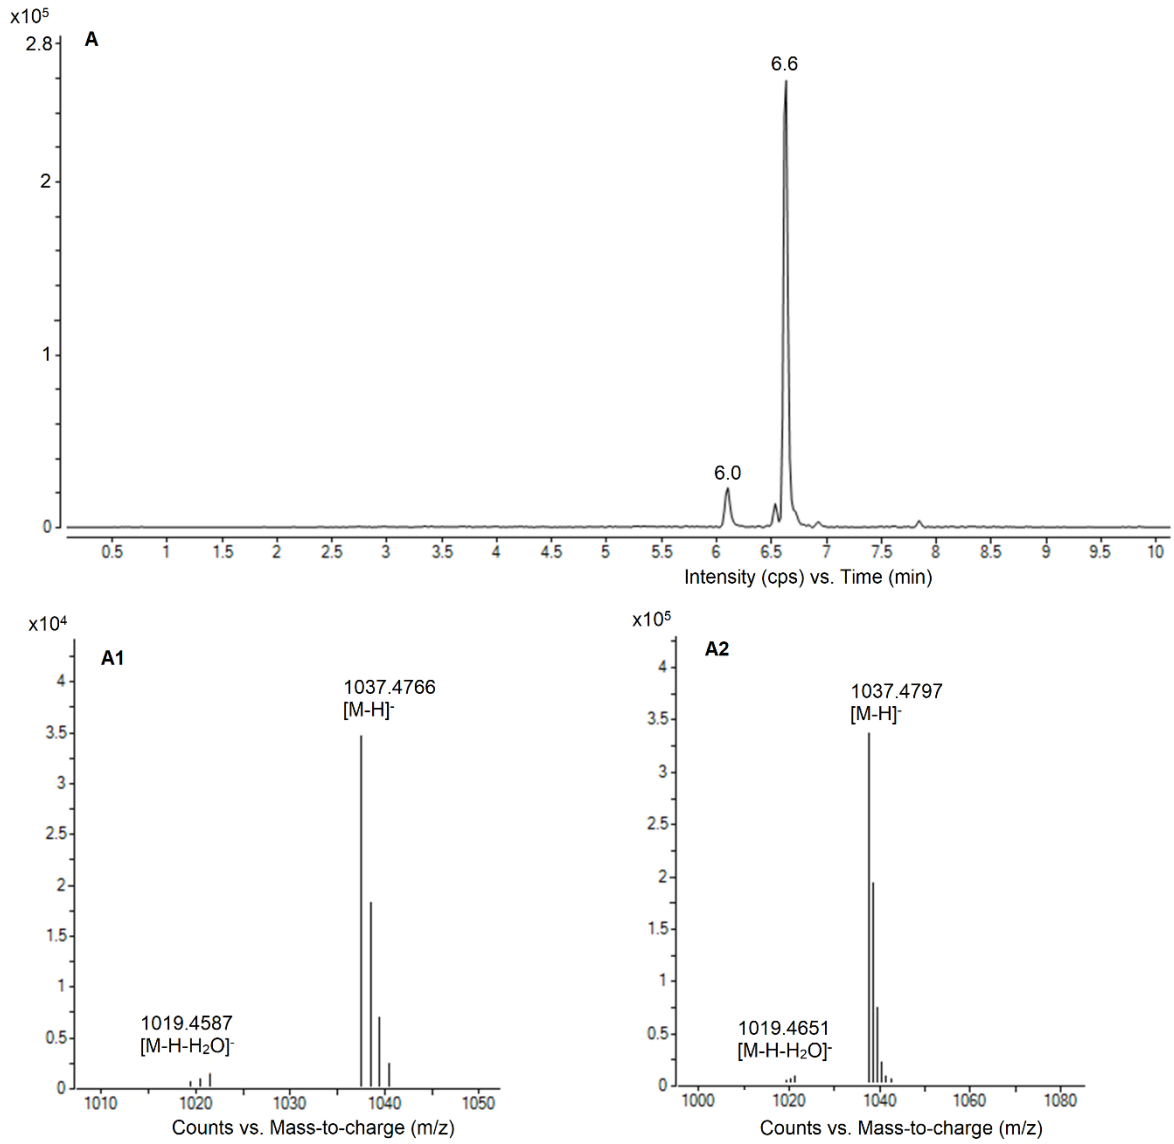

**Figure S1.** (A) LC-HRMS chromatogram of *C. tropicalis* extract and high resolution full scan mass spectra acquired in negative mode on the apex of peaks at (A1) 6.0 min for 44-methyl gambierone isomer and (A2) at 6.6 min for 44-methyl gambierone.

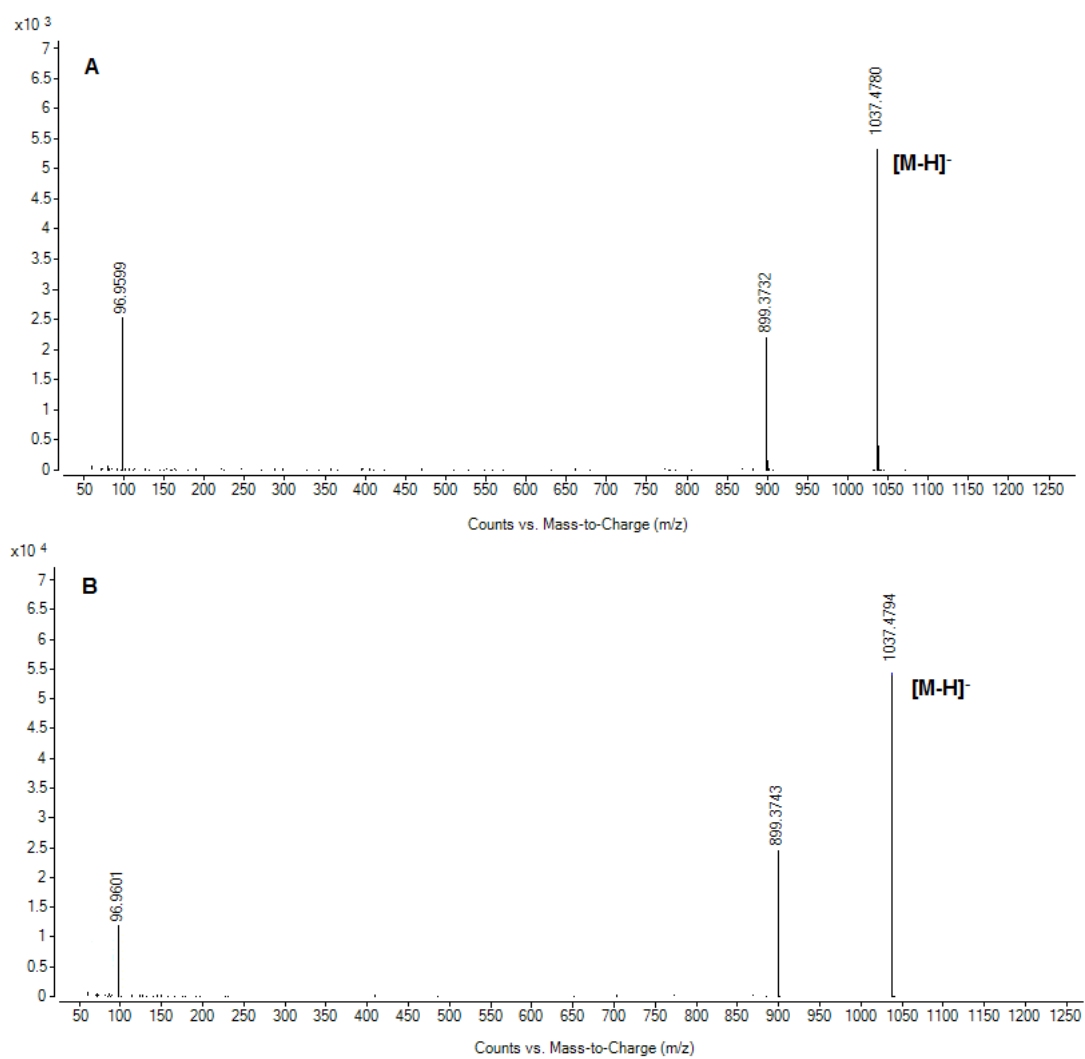

**Figure S2.** HRMS/MS spectra of  $[M-H]^-$  ( $m/z$  1037.4785) for (A) 44-methyl gambierone isomer at 6.0 min and for (B) 44-methyl gambierone at 6.6 min, resulting from an average of three collision energies (40, 65 and 90 eV).
